# Supplementary material for: Early Administration of Protein in Critically Ill Patients: A Retrospective Cohort Study
Source: PubMed Central journal article supplement (PMC6356518; doi:10.3390/nu11010106), 2019-01-07
Supplement: nutrients-11-00106-s001.pdf [file nutrients-11-00106-s001.pdf]

Table S1- Cox regression analysis

| Characteristic        | Odds ratio | 95% CI      | p-value |
|-----------------------|------------|-------------|---------|
| Age                   | 1.02       | 1.01 - 1.02 | <0.001  |
| Male gender           | 1.06       | 0.92 - 1.22 | 0.394   |
| SOFA score            | 1.12       | 1.1 - 1.14  | <0.001  |
| Vasopressors          | 1.06       | 0.92 - 1.21 | 0.433   |
| Length of stay        | 0.97       | 0.96 - 0.98 | <0.001  |
| Parenteral nutrition  | 1.74       | 1.46 - 2.07 | <0.001  |
| Administered Calories | 0.99       | 0.99-1.00   | 0.16    |
| Weight                | 0.99       | 0.99 - 1.00 | 0.008   |
| Protein after 3 days  | 0.93       | 0.66 - 1.32 | 0.697   |
| Late low protein      | 1.24       | 0.97 - 1.57 | 0.08    |
| Late High protein     | 1.21       | 1.03 - 1.42 | 0.018   |
